# Supplementary material for: Primary lung cancer samples cultured under microenvironment-mimetic conditions enrich for mesenchymal stem-like cells that promote metastasis
Source: PubMed Central journal article supplement (PMC6414636; doi:10.1038/s41598-019-40519-4), 2019-03-12
Supplement: 41598_2019_40519_MOESM2_ESM.pdf [file 41598_2019_40519_MOESM2_ESM.pdf]

# Primary lung cancer samples cultured under microenvironment-mimetic conditions enrich for mesenchymal stem-like cells that promote metastasis

**Douglas Saforo<sup>1</sup>, Linda Omer<sup>2,3</sup>, Andrei Smolenkov<sup>4</sup>, Aditya Barve<sup>1</sup>, Lavona Casson<sup>4</sup>, Nolan Boyd<sup>4,5</sup>, Geoffrey Clark<sup>1,4</sup>, Leah Siskind<sup>1,4\*</sup>, and Levi Beverly<sup>1,4,6\*</sup>**

<sup>1</sup>University of Louisville, Department of Pharmacology & Toxicology, Louisville, KY, 40202, USA

<sup>2</sup>University of Louisville, Department of Biochemistry & Molecular Genetics, Louisville, KY, 40202, USA

<sup>3</sup>University of Louisville, Cardiovascular Innovation Institute, Louisville, KY, 40202, USA

<sup>4</sup>University of Louisville, James Graham Brown Cancer Center, Louisville, KY, 40202, USA

<sup>5</sup>University of Louisville, Department of Physiology, Louisville, KY, 40202, USA

<sup>6</sup>University of Louisville, Department of Medicine, Louisville, KY, 40202, USA

\*leah.siskind@louisville.edu and levi.beverly@louisville.edu

**Table S1. Antibodies and RT-qPCR primers**

| Antibody                      | Host   | Catalog | Distributor                 |
|-------------------------------|--------|---------|-----------------------------|
| HIF-1 $\alpha$ (D2U3T)        | Rabbit | #14179  | Cell Signaling Technologies |
| p21 Waf1/Cip1 (12D1)          | Rabbit | #2947   | Cell Signaling Technologies |
| $\alpha$ -Smooth Muscle Actin | Rabbit | #14968  | Cell Signaling Technologies |
| Vimentin (D21H3)              | Rabbit | #5741   | Cell Signaling Technologies |
| E-Cadherin (24E10)            | Rabbit | #3195   | Cell Signaling Technologies |
| TGF- $\beta$                  | Rabbit | #3711   | Cell Signaling Technologies |
| Basic Cytokeratin (AE3)       | Mouse  | #57004  | Santa Cruz                  |
| p27 Kip1                      | Mouse  | #610242 | BD Biosciences              |
| $\beta$ -Actin                | Mouse  | #A2228  | Sigma                       |
| Rabbit IgG HRP                | Goat   | #7074   | Cell Signaling Technologies |
| Mouse IgG HRP                 | Horse  | #7076   | Cell Signaling Technologies |

| Gene              | Forward                      | Reverse                    | Efficiency (%) |
|-------------------|------------------------------|----------------------------|----------------|
| ZFP42 (REX-1)     | TTTGAGTCCTTGGAAATACCTAAAGAAA | AATTCTCTCCAACATCTTTTGTGGAA | 93.69          |
| TNC (Tenascin C)  | GAGAACAAGAAGAGCATTCCTGTCA    | GGACTTGAATTCAGGCCTTCA      | 100.29         |
| POSTN (Periostin) | TGGTTATATGAGAATGGAAGGAATGA   | GTCAGAATAGCGCTGCGTTGT      | 97.47          |
| NANOG             | GAACCTCAGCTACAAACAGGTGAA     | TTTCTGCCACCTCTTAGATTTTATT  | 95.11          |
| POU5F1 (Oct4)     | CCAAGCTCCTGAAGCAGAAGA        | TTGGCTGAATACCTTCCAAA       | 96.03          |
| SOX2              | GCACAACCTCGGAGATCAGCA        | TCTCCGTCTCCGACAAAAGTTT     | 97.16          |
| CPSG4 (NG2)       | CACTGTCCTGCCTGTCAATGA        | CCGTCCTGCTCCTCAGA          | 91.39          |
| VEGFA             | CTTGCTGCTCTACCTCCACCAT       | GACATCCATGAACTTCACTTCC     | 107.09         |
| B2M               | TGACTTTGTCACGCCAAGATA        | AATGCGGCATCTCAAACCT        | 93.22          |

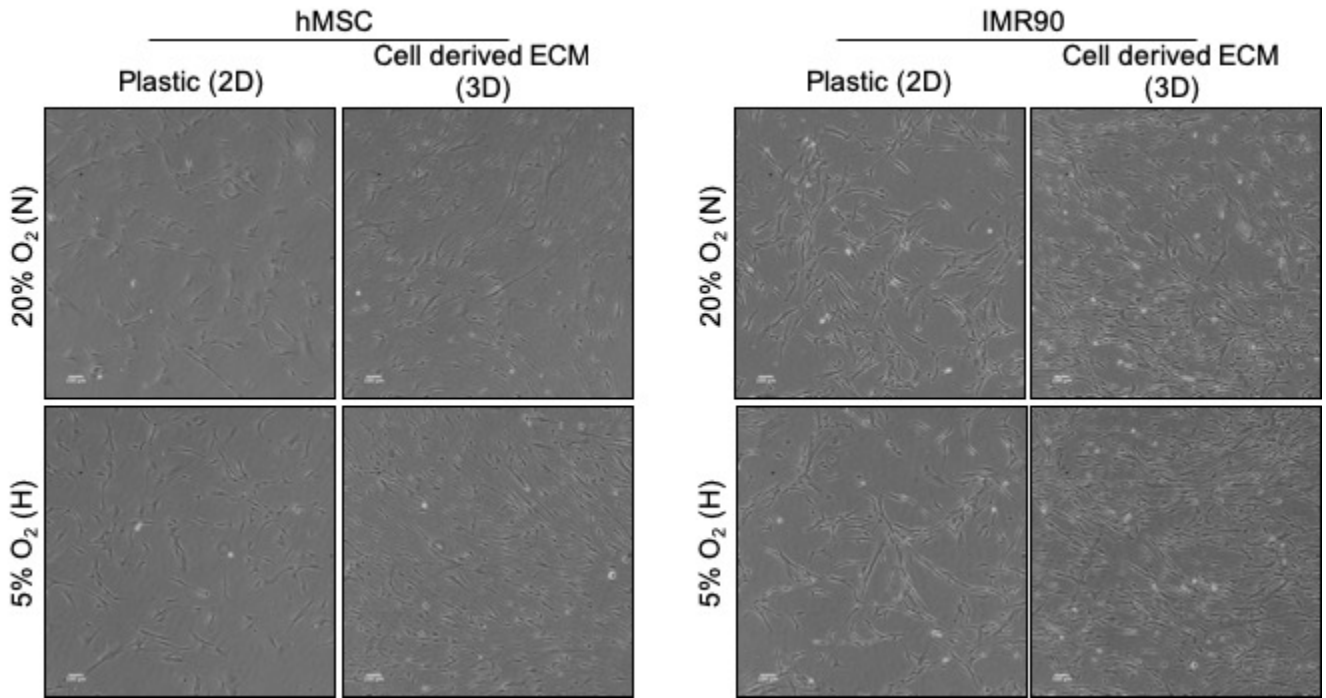

**Figure S1.** Phase contrast images of equal numbers hMSC and IMR90 fetal lung fibroblast cells grown for 72 hours in four environmental conditions (2D Normoxia, 2D Hypoxia, 3D Normoxia, and 3D Hypoxia). Scale bars are 100 $\mu$ M.

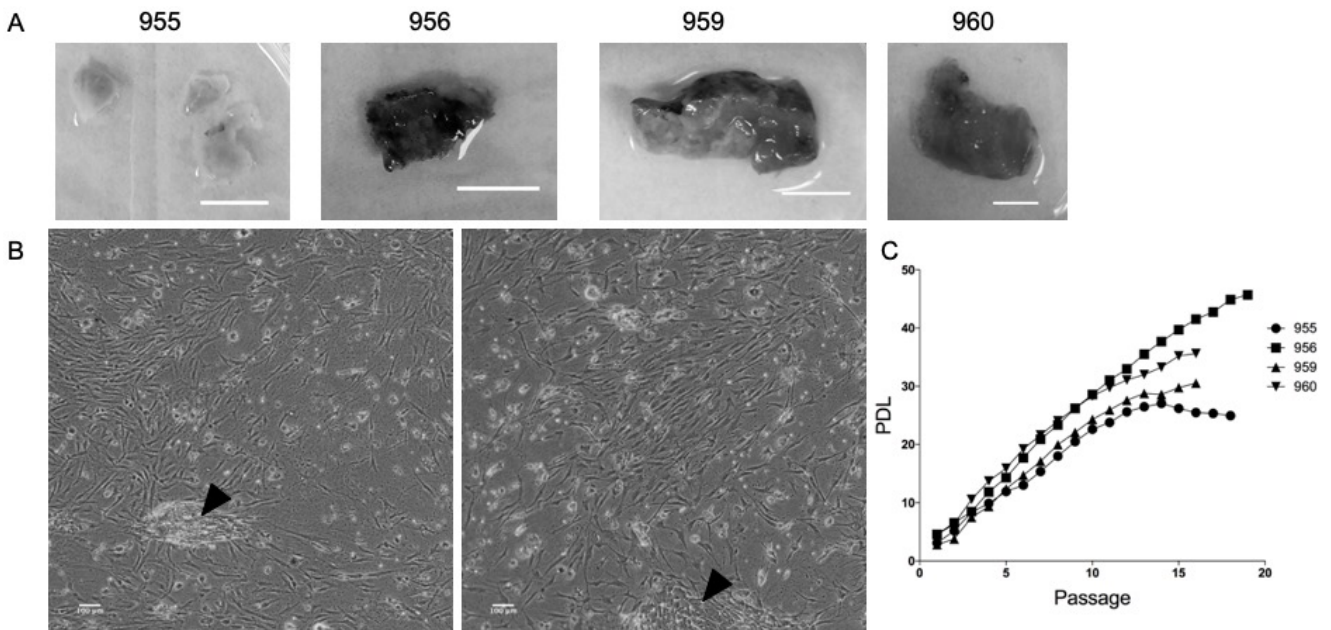

**Figure S2.** A. Images of patient tumor resections prior to dissection and dissociation. Scale bars are 1 cm. B. Phase contrast images of dissociated tumor cell growth from sample 956 7 days post isolation showing a heterogeneous cell population. Arrowheads indicate clumps of non-fibroblastic colonies. Scale bars are 100 $\mu$ M. C. Population doubling level of cell lines derived from patient tumors and cultivated in 3DH.

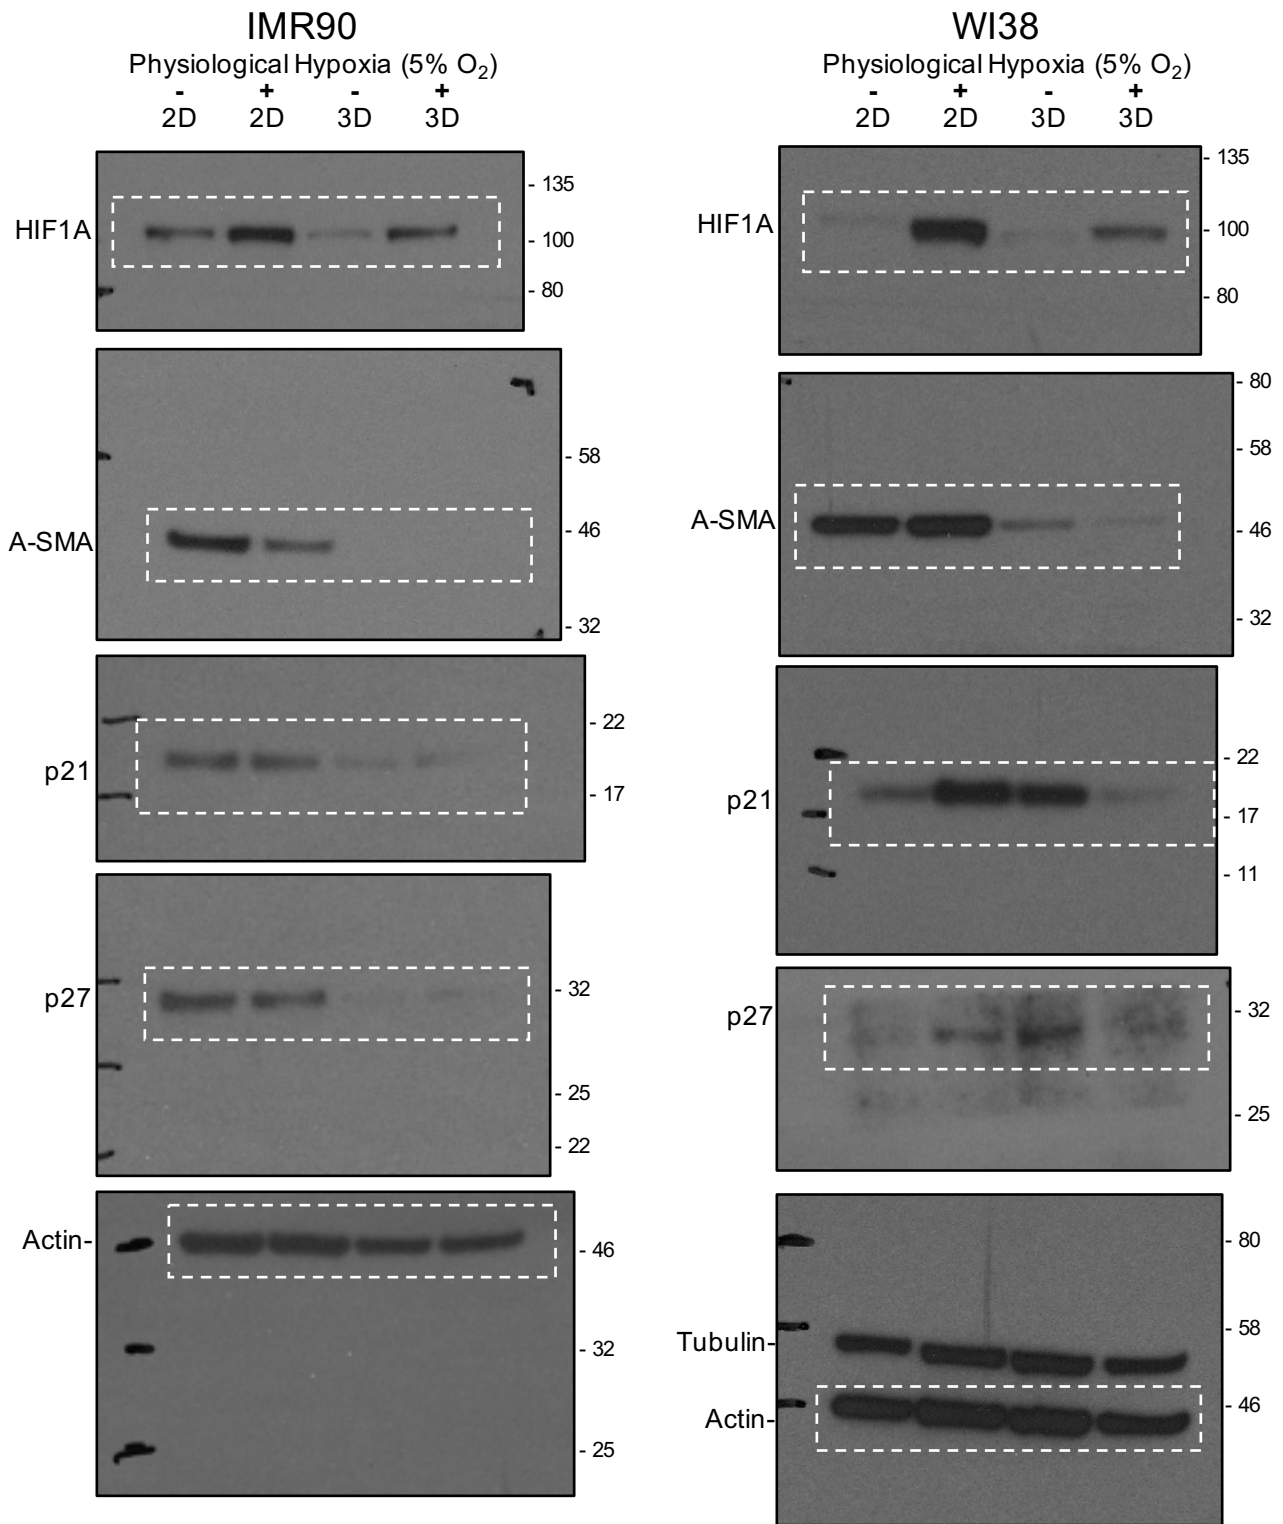

**Figure S3.** Full length blots of Figure 1D. White dashed lines indicate cropped areas. Brightness was adjusted in processing IMR90 blots of p21, p27, and actin.

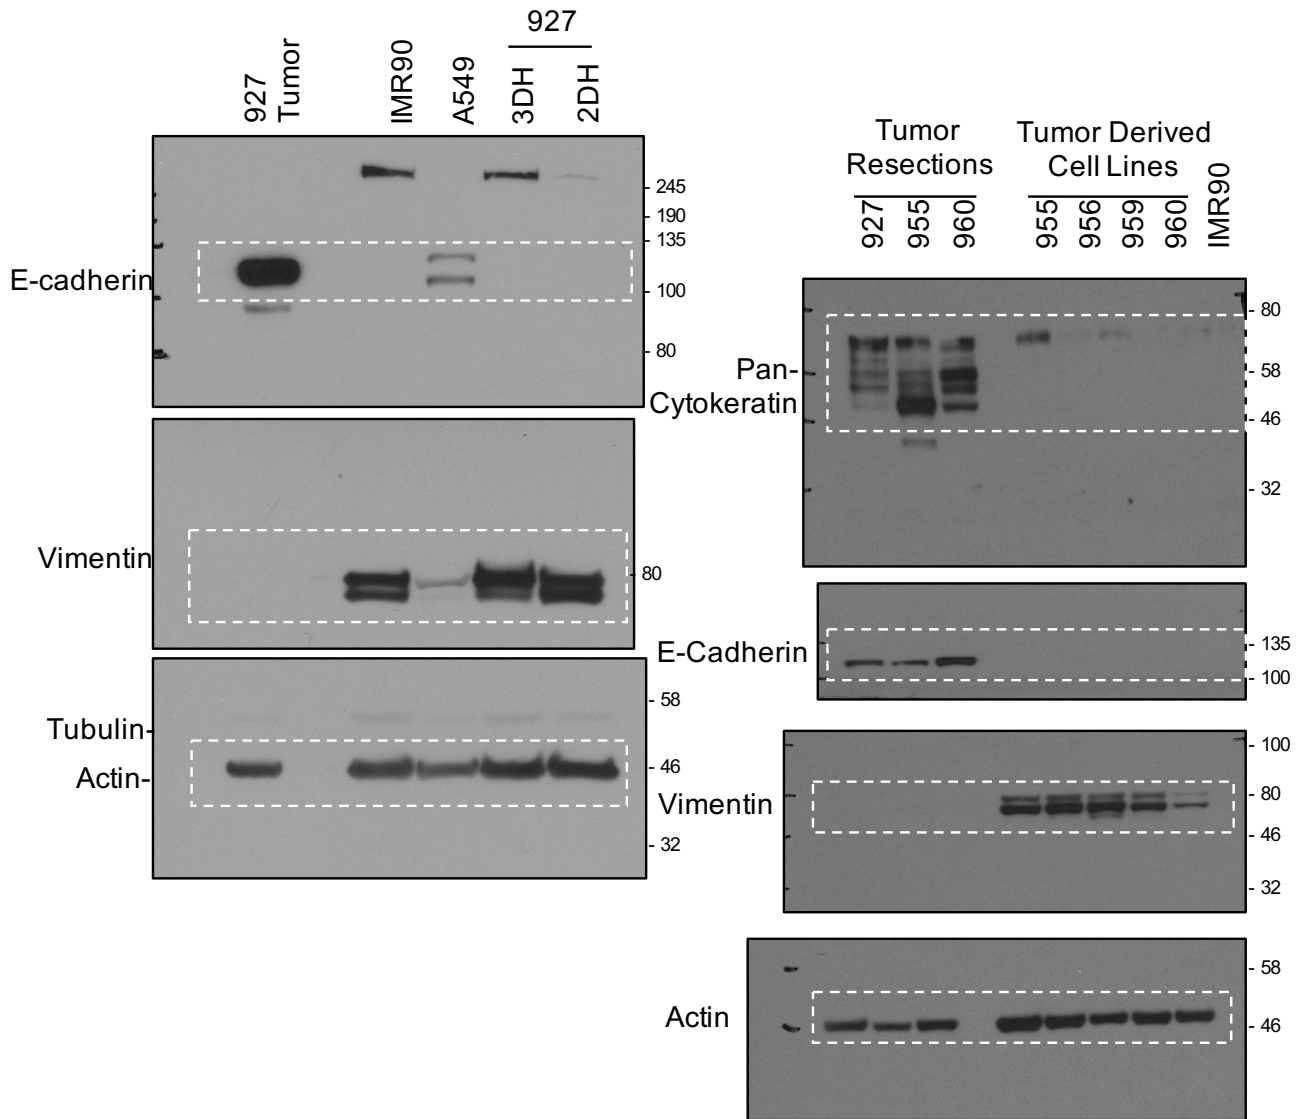

**Figure S4.** Full length blots of Figure 3A. White dashed lines indicate cropped areas.

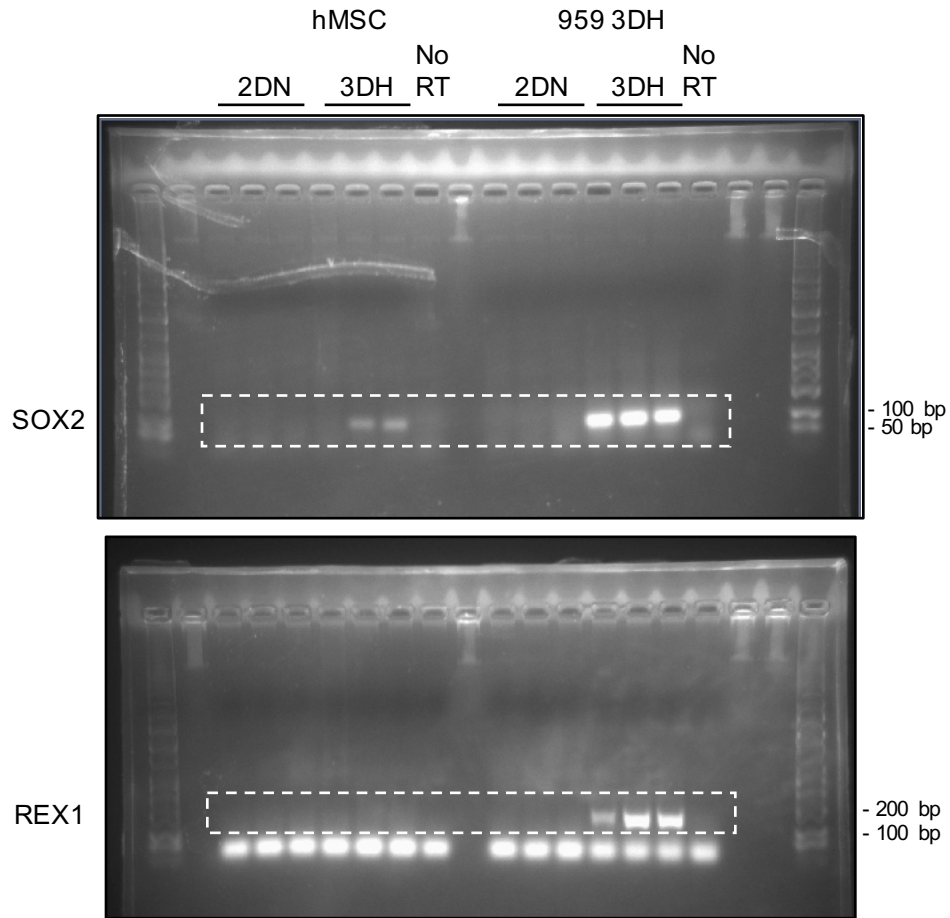

**Figure S5.** Full length gels of Figure 5A. White dashed lines indicate cropped areas.

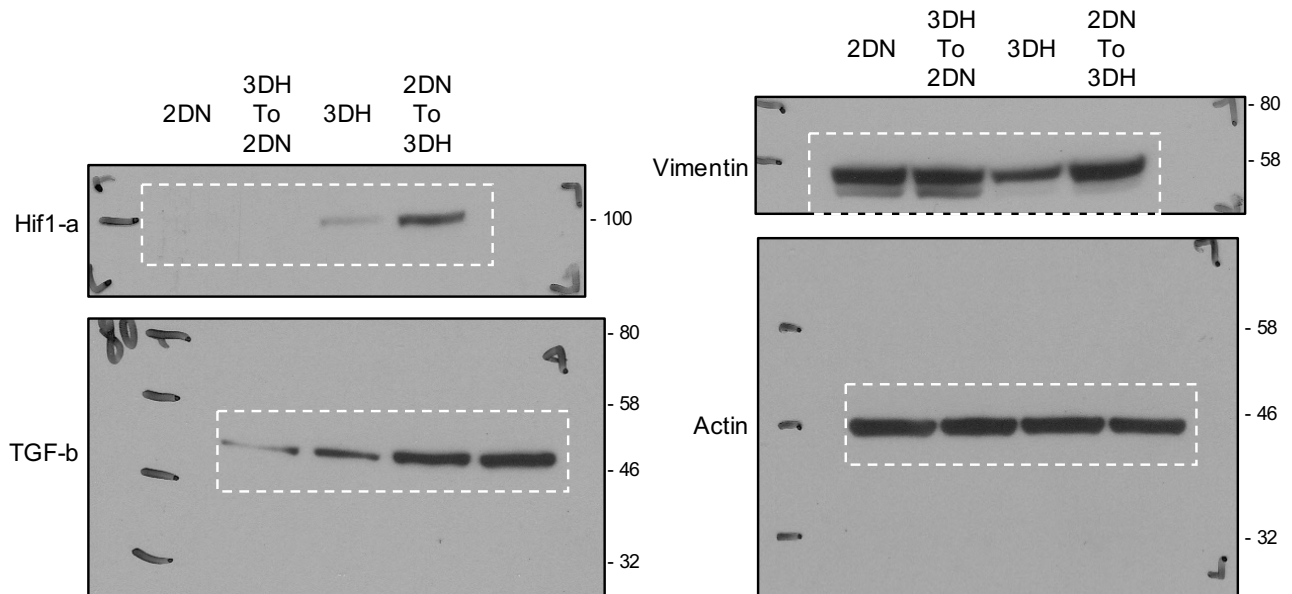

**Figure S6.** Full length blots of Figure 5C. White dashed lines indicate cropped areas.
